# Supplementary material
Source: PubMed Central journal article supplement (PMC4151613)
Supplement: NIHMS622568-supplement-Supplementary_Table_S5.pdf [file NIHMS622568-supplement-Supplementary_Table_S5.pdf]

**Supplementary Table S5.**

List of genes differentially expressed between sole +8 versus cytogenetically normal de novo acute myeloid leukemia patients

| Symbol       | Name                                                                        | EntrezID  | Fold-change | Parametric p-value |
|--------------|-----------------------------------------------------------------------------|-----------|-------------|--------------------|
| DPYSL2       | dihydropyrimidinase-like 2                                                  | 1808      | 2,07        | 2,66E-05           |
| APP          | amyloid beta (A4) precursor protein                                         | 351       | 2,06        | 3,19E-05           |
| BAALC        | brain and acute leukemia, cytoplasmic                                       | 79870     | 2,04        | 2,14E-05           |
| GJA1         | gap junction protein, alpha 1, 43kDa                                        | 2697      | 2,01        | 8,73E-05           |
| RBPMS        | RNA binding protein with multiple splicing                                  | 11030     | 1,97        | 5,30E-06           |
| ADM          | adrenomedullin                                                              | 133       | 1,94        | 7,52E-05           |
| EPS8         | epidermal growth factor receptor pathway substrate 8                        | 2059      | 1,88        | 2,84E-05           |
| FZD6         | frizzled family receptor 6                                                  | 8323      | 1,86        | 1,71E-05           |
| BEND4        | BEN domain containing 4                                                     | 389206    | 1,86        | 0,0001169          |
| CPNE3        | copine III                                                                  | 8895      | 1,85        | < 1e-07            |
| ADAMTSL4     | ADAMTS-like 4                                                               | 54507     | 1,85        | 3,00E-07           |
| FAM169A      | family with sequence similarity 169, member A                               | 26049     | 1,82        | 2,00E-07           |
| LY96         | lymphocyte antigen 96                                                       | 23643     | 1,82        | 6,36E-05           |
| H1FO         | H1 histone family, member 0                                                 | 3005      | 1,82        | 0,0001257          |
| KLF9         | Kruppel-like factor 9                                                       | 687       | 1,81        | < 1e-07            |
| GPR124       | G protein-coupled receptor 124                                              | 25960     | 1,8         | 4,50E-06           |
| ABCB1        | ATP-binding cassette, sub-family B (MDR/TAP), member 1                      | 5243      | 1,79        | 0,0001236          |
| ID1          | inhibitor of DNA binding 1, dominant negative helix-loop-helix              | 3397      | 1,78        | 1,41E-05           |
| PLSCR4       | phospholipid scramblase 4                                                   | 57088     | 1,76        | 6,00E-06           |
| SCRN1        | secernin 1                                                                  | 9805      | 1,75        | 0,0006492          |
| MFHAS1       | malignant fibrous histiocytoma amplified sequence 1                         | 9258      | 1,74        | < 1e-07            |
| CXCR7        | chemokine (C-X-C motif) receptor 7                                          | 57007     | 1,73        | 1,02E-05           |
| SPAG1        | sperm associated antigen 1                                                  | 6674      | 1,72        | < 1e-07            |
| CKAP4        | cytoskeleton-associated protein 4                                           | 10970     | 1,72        | 2,41E-05           |
| CLIC2        | chloride intracellular channel 2                                            | 1193      | 1,7         | 0,0004149          |
| MN1          | meningioma (disrupted in balanced translocation) 1                          | 4330      | 1,7         | 0,0004839          |
| NID1         | nidogen 1                                                                   | 4811      | 1,66        | 0,0003085          |
| BAG3         | BCL2-associated athanogene 3                                                | 9531      | 1,66        | 0,0003494          |
| MRPL15       | mitochondrial ribosomal protein L15                                         | 29088     | 1,65        | < 1e-07            |
| SDC2         | syndecan 2                                                                  | 6383      | 1,65        | 0,0006866          |
| LAMC1        | laminin, gamma 1 (formerly LAMB2)                                           | 3915      | 1,64        | < 1e-07            |
| F2RL1        | coagulation factor II (thrombin) receptor-like 1                            | 2150      | 1,64        | < 1e-07            |
| LPL          | lipoprotein lipase                                                          | 4023      | 1,64        | 2,00E-07           |
| TMEM55A      | transmembrane protein 55A                                                   | 55529     | 1,63        | < 1e-07            |
| EMP1         | epithelial membrane protein 1                                               | 2012      | 1,63        | 0,0002095          |
| PDP1         | pyruvate dehydrogenase phosphatase catalytic subunit                        | 54704     | 1,62        | < 1e-07            |
| EMR1         | egf-like module containing, mucin-like, hormone receptor-like 1             | 2015      | 1,62        | 5,90E-06           |
| THBD         | thrombomodulin                                                              | 7056      | 1,62        | 0,0001521          |
| GBP1         | guanylate binding protein 1, interferon-inducible                           | 2633      | 1,62        | 0,0001632          |
| AK4          | adenylate kinase 4                                                          | 205       | 1,61        | < 1e-07            |
| PLS3         | plastin 3                                                                   | 5358      | 1,61        | 3,52E-05           |
| SLC25A37     | solute carrier family 25 (mitochondrial iron transporter)                   | 51312     | 1,61        | 0,000258           |
| LOC100127983 | uncharacterized LOC100127983                                                | 100127983 | 1,61        | 0,0003816          |
| PLEKHA2      | pleckstrin homology domain containing, family A (phosphoinositide 3-kinase) | 59339     | 1,6         | < 1e-07            |
| NAT1         | N-acetyltransferase 1 (arylamine N-acetyltransferase)                       | 9         | 1,6         | < 1e-07            |
| SPARC        | secreted protein, acidic, cysteine-rich (osteonectin)                       | 6678      | 1,6         | 8,28E-05           |
| RRM2B        | ribonucleotide reductase M2 B (TP53 inducible)                              | 50484     | 1,59        | < 1e-07            |
| TRPS1        | trichorhinophalangeal syndrome I                                            | 7227      | 1,59        | < 1e-07            |
| EGR3         | early growth response 3                                                     | 1960      | 1,59        | 0,000103           |
| DDIT4        | DNA-damage-inducible transcript 4                                           | 54541     | 1,59        | 0,0001132          |

|                  |                                                           |        |      |           |
|------------------|-----------------------------------------------------------|--------|------|-----------|
| <i>ALDH2</i>     | aldehyde dehydrogenase 2 family (mitochondrial)           | 217    | 1,59 | 0,0008205 |
| <i>SETD7</i>     | SET domain containing (lysine methyltransferase) 7        | 80854  | 1,58 | 1,00E-07  |
| <i>ARAP2</i>     | ArfGAP with RhoGAP domain, ankyrin repeat and PH          | 116984 | 1,58 | 2,08E-05  |
| <i>CTSB</i>      | cathepsin B                                               | 1508   | 1,57 | < 1e-07   |
| <i>GGH</i>       | gamma-glutamyl hydrolase (conjugase, folylpolygamn        | 8836   | 1,57 | 3,00E-07  |
| <i>PTK2</i>      | PTK2 protein tyrosine kinase 2                            | 5747   | 1,57 | 7,92E-05  |
| <i>FHL1</i>      | four and a half LIM domains 1                             | 2273   | 1,57 | 0,0003448 |
| <i>CCNE2</i>     | cyclin E2                                                 | 9134   | 1,56 | 1,40E-06  |
| <i>MT1G</i>      | metallothionein 1G                                        | 4495   | 1,56 | 1,80E-06  |
| <i>THSD7A</i>    | thrombospondin, type I, domain containing 7A              | 221981 | 1,56 | 0,0001088 |
| <i>FAM213A</i>   | family with sequence similarity 213, member A             | 84293  | 1,56 | 0,0005141 |
| <i>WWP1</i>      | WW domain containing E3 ubiquitin protein ligase 1        | 11059  | 1,55 | < 1e-07   |
| <i>TPD52</i>     | tumor protein D52                                         | 7163   | 1,55 | 3,00E-06  |
| <i>ADAM9</i>     | ADAM metallopeptidase domain 9                            | 8754   | 1,54 | 4,33E-05  |
| <i>FOXO1</i>     | forkhead box O1                                           | 2308   | 1,54 | 8,89E-05  |
| <i>SHCBP1</i>    | SHC SH2-domain binding protein 1                          | 79801  | 1,54 | 0,0001225 |
| <i>TCEB1</i>     | transcription elongation factor B (SIII), polypeptide 1 ( | 6921   | 1,53 | < 1e-07   |
| <i>UBE2V2</i>    | ubiquitin-conjugating enzyme E2 variant 2                 | 7336   | 1,53 | < 1e-07   |
| <i>TMEM70</i>    | transmembrane protein 70                                  | 54968  | 1,52 | < 1e-07   |
| <i>HOOK3</i>     | hook homolog 3 (Drosophila)                               | 84376  | 1,52 | < 1e-07   |
| <i>EIF2C2</i>    | eukaryotic translation initiation factor 2C, 2            | 27161  | 1,52 | < 1e-07   |
| <i>ARHGEF10</i>  | Rho guanine nucleotide exchange factor (GEF) 10           | 9639   | 1,52 | 7,00E-07  |
| <i>MTMR11</i>    | myotubularin related protein 11                           | 10903  | 1,52 | 0,0002842 |
| <i>ANKRD46</i>   | ankyrin repeat domain 46                                  | 157567 | 1,51 | 7,00E-07  |
| <i>ASAP1-IT1</i> | ASAP1 intronic transcript 1 (non-protein coding)          | 29065  | 1,51 | 3,10E-06  |
| <i>TNS3</i>      | tensin 3                                                  | 64759  | 1,51 | 8,48E-05  |
| <i>GNPDA1</i>    | glucosamine-6-phosphate deaminase 1                       | 10007  | 1,51 | 0,0001282 |
| <i>VPS37A</i>    | vacuolar protein sorting 37 homolog A (S. cerevisiae)     | 137492 | 1,5  | < 1e-07   |
| <i>CHCHD7</i>    | coiled-coil-helix-coiled-coil-helix domain containing 7   | 79145  | 1,5  | < 1e-07   |
| <i>MTHFD2</i>    | methylenetetrahydrofolate dehydrogenase (NADP+ de         | 10797  | 1,5  | < 1e-07   |
| <i>PLCB4</i>     | phospholipase C, beta 4                                   | 5332   | 1,5  | 2,80E-06  |
| <i>EBAG9</i>     | estrogen receptor binding site associated, antigen, 9     | 9166   | 1,49 | < 1e-07   |
| <i>TM2D2</i>     | TM2 domain containing 2                                   | 83877  | 1,49 | < 1e-07   |
| <i>SNX16</i>     | sorting nexin 16                                          | 64089  | 1,49 | < 1e-07   |
| <i>CPQ</i>       | carboxypeptidase Q                                        | 10404  | 1,49 | < 1e-07   |
| <i>FBXO6</i>     | F-box protein 6                                           | 26270  | 1,49 | 1,91E-05  |
| <i>KBTBD8</i>    | kelch repeat and BTB (POZ) domain containing 8            | 84541  | 1,49 | 4,99E-05  |
| <i>ADORA2B</i>   | adenosine A2b receptor                                    | 136    | 1,48 | 1,73E-05  |
| <i>TCTEX1D1</i>  | Tctex1 domain containing 1                                | 200132 | 1,48 | 1,91E-05  |
| <i>ZAK</i>       | sterile alpha motif and leucine zipper containing kinas   | 51776  | 1,48 | 0,0001229 |
| <i>ST3GAL1</i>   | ST3 beta-galactoside alpha-2,3-sialyltransferase 1        | 6482   | 1,47 | < 1e-07   |
| <i>SLITRK4</i>   | SLIT and NTRK-like family, member 4                       | 139065 | 1,47 | 6,48E-05  |
| <i>MRPL13</i>    | mitochondrial ribosomal protein L13                       | 28998  | 1,46 | < 1e-07   |
| <i>HEATR7A</i>   | HEAT repeat containing 7A                                 | 727957 | 1,46 | < 1e-07   |
| <i>MTERFD1</i>   | MTERF domain containing 1                                 | 51001  | 1,46 | < 1e-07   |
| <i>LACTB2</i>    | lactamase, beta 2                                         | 51110  | 1,46 | 2,00E-07  |
| <i>KBTBD11</i>   | kelch repeat and BTB (POZ) domain containing 11           | 9920   | 1,46 | 0,0003231 |
| <i>AURKA</i>     | aurora kinase A                                           | 6790   | 1,46 | 0,0004788 |
| <i>VDAC3</i>     | voltage-dependent anion channel 3                         | 7419   | 1,45 | < 1e-07   |
| <i>ZNF706</i>    | zinc finger protein 706                                   | 51123  | 1,45 | < 1e-07   |
| <i>GRINA</i>     | glutamate receptor, ionotropic, N-methyl D-aspartate-r    | 2907   | 1,45 | < 1e-07   |
| <i>PTP4A3</i>    | protein tyrosine phosphatase type IVA, member 3           | 11156  | 1,45 | 3,70E-06  |
| <i>TET2</i>      | tet methylcytosine dioxygenase 2                          | 54790  | 1,45 | 5,60E-06  |
| <i>SGMS1</i>     | sphingomyelin synthase 1                                  | 259230 | 1,45 | 0,0001103 |
| <i>RUNX3</i>     | runt-related transcription factor 3                       | 864    | 1,45 | 0,0001234 |

|                     |                                                          |           |      |           |
|---------------------|----------------------------------------------------------|-----------|------|-----------|
| <i>KLRB1</i>        | killer cell lectin-like receptor subfamily B, member 1   | 3820      | 1,45 | 0,0005792 |
| <i>ERLIN2</i>       | ER lipid raft associated 2                               | 11160     | 1,44 | < 1e-07   |
| <i>CORO2A</i>       | coronin, actin binding protein, 2A                       | 7464      | 1,44 | 1,00E-07  |
| <i>BMPR2</i>        | bone morphogenetic protein receptor, type II (serine/thr | 659       | 1,44 | 1,00E-07  |
| <i>CDCA2</i>        | cell division cycle associated 2                         | 157313    | 1,44 | 1,70E-06  |
| <i>SRD5A1</i>       | steroid-5-alpha-reductase, alpha polypeptide 1 (3-oxo    | 6715      | 1,44 | 1,90E-06  |
| <i>SERPINI1</i>     | serpin peptidase inhibitor, clade I (neuroserpin), mem   | 5274      | 1,44 | 5,70E-06  |
| <i>HRSP12</i>       | heat-responsive protein 12                               | 10247     | 1,44 | 1,34E-05  |
| <i>PLAG1</i>        | pleiomorphic adenoma gene 1                              | 5324      | 1,44 | 2,96E-05  |
| <i>PPP1R3B</i>      | protein phosphatase 1, regulatory subunit 3B             | 79660     | 1,44 | 4,51E-05  |
| <i>TSPYL5</i>       | TSPY-like 5                                              | 85453     | 1,44 | 0,0003941 |
| <i>UTP23</i>        | UTP23, small subunit (SSU) processome component,         | 84294     | 1,43 | < 1e-07   |
| <i>COPS5</i>        | COP9 constitutive photomorphogenic homolog subun         | 10987     | 1,43 | < 1e-07   |
| <i>MCPH1</i>        | microcephalin 1                                          | 79648     | 1,43 | < 1e-07   |
| <i>ATAD2</i>        | ATPase family, AAA domain containing 2                   | 29028     | 1,43 | < 1e-07   |
| <i>PHF20L1</i>      | PHD finger protein 20-like 1                             | 51105     | 1,43 | < 1e-07   |
| <i>RB1CC1</i>       | RB1-inducible coiled-coil 1                              | 9821      | 1,43 | 4,00E-07  |
| <i>SPIRE1</i>       | spire homolog 1 (Drosophila)                             | 56907     | 1,43 | 3,50E-06  |
| <i>MXI1</i>         | MAX interactor 1                                         | 4601      | 1,43 | 2,08E-05  |
| <i>LOC100996552</i> | uncharacterized LOC100996552                             | 100996552 | 1,43 | 0,0001007 |
| <i>BCL2L11</i>      | BCL2-like 11 (apoptosis facilitator)                     | 10018     | 1,43 | 0,0001148 |
| <i>F2R</i>          | coagulation factor II (thrombin) receptor                | 2149      | 1,43 | 0,0002752 |
| <i>EPB41L2</i>      | erythrocyte membrane protein band 4.1-like 2             | 2037      | 1,43 | 0,0003131 |
| <i>ITGB5</i>        | integrin, beta 5                                         | 3693      | 1,43 | 0,0005519 |
| <i>ARMC1</i>        | armadillo repeat containing 1                            | 55156     | 1,42 | < 1e-07   |
| <i>FAM82B</i>       | family with sequence similarity 82, member B             | 51115     | 1,42 | < 1e-07   |
| <i>PTDSS1</i>       | phosphatidylserine synthase 1                            | 9791      | 1,42 | < 1e-07   |
| <i>EFR3A</i>        | EFR3 homolog A (S. cerevisiae)                           | 23167     | 1,42 | < 1e-07   |
| <i>B4GALT5</i>      | UDP-Gal:betaGlcNAc beta 1,4- galactosyltransferase,      | 9334      | 1,42 | 2,10E-06  |
| <i>PSD3</i>         | pleckstrin and Sec7 domain containing 3                  | 23362     | 1,42 | 3,80E-06  |
| <i>MS4A4A</i>       | membrane-spanning 4-domains, subfamily A, membe          | 51338     | 1,42 | 0,0009992 |
| <i>TTI2</i>         | TELO2 interacting protein 2                              | 80185     | 1,41 | < 1e-07   |
| <i>PPP3CC</i>       | protein phosphatase 3, catalytic subunit, gamma isoz     | 5533      | 1,41 | < 1e-07   |
| <i>SDCBP</i>        | syndecan binding protein (syntenin)                      | 6386      | 1,41 | < 1e-07   |
| <i>GINS4</i>        | GINS complex subunit 4 (Sld5 homolog)                    | 84296     | 1,41 | < 1e-07   |
| <i>TNFRSF10A</i>    | tumor necrosis factor receptor superfamily, member 1     | 8797      | 1,41 | < 1e-07   |
| <i>OXR1</i>         | oxidation resistance 1                                   | 55074     | 1,41 | 2,00E-07  |
| <i>OSGIN2</i>       | oxidative stress induced growth inhibitor family memb    | 734       | 1,41 | 3,00E-07  |
| <i>PLEKHA1</i>      | pleckstrin homology domain containing, family A (phos    | 59338     | 1,41 | 8,20E-06  |
| <i>KLF10</i>        | Kruppel-like factor 10                                   | 7071      | 1,41 | 2,50E-05  |
| <i>C5orf25</i>      | chromosome 5 open reading frame 25                       | 375484    | 1,41 | 2,64E-05  |
| <i>SGPP1</i>        | sphingosine-1-phosphate phosphatase 1                    | 81537     | 1,41 | 0,0003557 |
| <i>PLOD2</i>        | procollagen-lysine, 2-oxoglutarate 5-dioxygenase 2       | 5352      | 1,41 | 0,0004123 |
| <i>C4orf32</i>      | chromosome 4 open reading frame 32                       | 132720    | 1,41 | 0,0004674 |
| <i>GBP2</i>         | guanylate binding protein 2, interferon-inducible        | 2634      | 1,41 | 0,0008197 |
| <i>ENY2</i>         | enhancer of yellow 2 homolog (Drosophila)                | 56943     | 1,4  | < 1e-07   |
| <i>C8orf40</i>      | chromosome 8 open reading frame 40                       | 114926    | 1,4  | < 1e-07   |
| <i>ZFAND1</i>       | zinc finger, AN1-type domain 1                           | 79752     | 1,4  | < 1e-07   |
| <i>OTUD6B</i>       | OTU domain containing 6B                                 | 51633     | 1,4  | 1,00E-07  |
| <i>LOC100506342</i> | uncharacterized LOC100506342                             | 100506342 | 1,4  | 2,00E-07  |
| <i>SIAE</i>         | sialic acid acetyltransferase                            | 54414     | 1,4  | 2,00E-07  |
| <i>CKAP2</i>        | cytoskeleton associated protein 2                        | 26586     | 1,4  | 5,00E-07  |
| <i>PNMA1</i>        | paraneoplastic Ma antigen 1                              | 9240      | 1,4  | 7,00E-07  |
| <i>PROSC</i>        | proline synthetase co-transcribed homolog (bacterial)    | 11212     | 1,4  | 2,60E-06  |
| <i>ASAP1</i>        | ArfGAP with SH3 domain, ankyrin repeat and PH dom        | 50807     | 1,4  | 3,60E-06  |

|                     |                                                                |           |      |           |
|---------------------|----------------------------------------------------------------|-----------|------|-----------|
| <i>HINT3</i>        | histidine triad nucleotide binding protein 3                   | 135114    | 1,4  | 2,97E-05  |
| <i>SLC16A1</i>      | solute carrier family 16, member 1 (monocarboxylic ac          | 6566      | 1,4  | 3,78E-05  |
| <i>MT1F</i>         | metallothionein 1F                                             | 4494      | 1,4  | 4,09E-05  |
| <i>NDFIP1</i>       | Nedd4 family interacting protein 1                             | 80762     | 1,4  | 7,45E-05  |
| <i>GPR160</i>       | G protein-coupled receptor 160                                 | 26996     | 1,4  | 0,0002081 |
| <i>LRP12</i>        | low density lipoprotein receptor-related protein 12            | 29967     | 1,4  | 0,000254  |
| <i>FAM49B</i>       | family with sequence similarity 49, member B                   | 51571     | 1,39 | < 1e-07   |
| <i>WDYHV1</i>       | WDYHV motif containing 1                                       | 55093     | 1,39 | < 1e-07   |
| <i>THAP1</i>        | THAP domain containing, apoptosis associated protei            | 55145     | 1,39 | < 1e-07   |
| <i>KAT6A</i>        | K(lysine) acetyltransferase 6A                                 | 7994      | 1,39 | < 1e-07   |
| <i>CLN8</i>         | ceroid-lipofuscinosis, neuronal 8 (epilepsy, progressiv        | 2055      | 1,39 | < 1e-07   |
| <i>NRBP2</i>        | nuclear receptor binding protein 2                             | 340371    | 1,39 | 5,00E-07  |
| <i>LOC100507303</i> | uncharacterized LOC100507303                                   | 100507303 | 1,39 | 2,14E-05  |
| <i>ENDOD1</i>       | endonuclease domain containing 1                               | 23052     | 1,39 | 6,70E-05  |
| <i>SACS</i>         | spastic ataxia of Charlevoix-Saguenay (sacsin)                 | 26278     | 1,39 | 0,0002131 |
| <i>CAMK2D</i>       | calcium/calmodulin-dependent protein kinase II delta           | 817       | 1,39 | 0,000414  |
| <i>PPAP2B</i>       | phosphatidic acid phosphatase type 2B                          | 8613      | 1,39 | 0,0006423 |
| <i>TGFBR3</i>       | transforming growth factor, beta receptor III                  | 7049      | 1,39 | 0,0009878 |
| <i>UBE2W</i>        | ubiquitin-conjugating enzyme E2W (putative)                    | 55284     | 1,38 | < 1e-07   |
| <i>ZNF7</i>         | zinc finger protein 7                                          | 7553      | 1,38 | < 1e-07   |
| <i>LOC100505812</i> | uncharacterized LOC100505812                                   | 100505812 | 1,38 | 6,80E-06  |
| <i>SLC30A1</i>      | solute carrier family 30 (zinc transporter), member 1          | 7779      | 1,38 | 3,46E-05  |
| <i>LY6E</i>         | lymphocyte antigen 6 complex, locus E                          | 4061      | 1,38 | 0,0001636 |
| <i>RNF139</i>       | ring finger protein 139                                        | 11236     | 1,37 | < 1e-07   |
| <i>PEX2</i>         | peroxisomal biogenesis factor 2                                | 5828      | 1,37 | < 1e-07   |
| <i>TACC1</i>        | transforming, acidic coiled-coil containing protein 1          | 6867      | 1,37 | < 1e-07   |
| <i>DCAF13</i>       | DDB1 and CUL4 associated factor 13                             | 25879     | 1,37 | < 1e-07   |
| <i>FAM43A</i>       | family with sequence similarity 43, member A                   | 131583    | 1,37 | < 1e-07   |
| <i>PDLIM2</i>       | PDZ and LIM domain 2 (mystique)                                | 64236     | 1,37 | 9,30E-06  |
| <i>RRAGD</i>        | Ras-related GTP binding D                                      | 58528     | 1,37 | 2,02E-05  |
| <i>DBNDD2</i>       | dysbindin (dystrobrevin binding protein 1) domain con          | 55861     | 1,37 | 5,27E-05  |
| <i>SYS1-DBNDD2</i>  | SYS1-DBNDD2 readthrough (non-protein coding)                   | 767557    | 1,37 | 5,27E-05  |
| <i>C8orf76</i>      | chromosome 8 open reading frame 76                             | 84933     | 1,36 | < 1e-07   |
| <i>REEP4</i>        | receptor accessory protein 4                                   | 80346     | 1,36 | < 1e-07   |
| <i>DDHD2</i>        | DDHD domain containing 2                                       | 23259     | 1,36 | < 1e-07   |
| <i>ATP6V1C1</i>     | ATPase, H <sup>+</sup> transporting, lysosomal 42kDa, V1 subun | 528       | 1,36 | 3,60E-06  |
| <i>FAM57A</i>       | family with sequence similarity 57, member A                   | 79850     | 1,36 | 8,30E-06  |
| <i>SLC18A2</i>      | solute carrier family 18 (vesicular monoamine), memb           | 6571      | 1,36 | 3,21E-05  |
| <i>PRKCH</i>        | protein kinase C, eta                                          | 5583      | 1,36 | 0,0001959 |
| <i>WASF3</i>        | WAS protein family, member 3                                   | 10810     | 1,36 | 0,000344  |
| <i>C3orf14</i>      | chromosome 3 open reading frame 14                             | 57415     | 1,36 | 0,0006522 |
| <i>TNFRSF10B</i>    | tumor necrosis factor receptor superfamily, member 10          | 8795      | 1,35 | 5,10E-06  |
| <i>ASAH1</i>        | N-acylsphingosine amidohydrolase (acid ceramidase)             | 427       | 1,35 | 8,70E-06  |
| <i>PTPRO</i>        | protein tyrosine phosphatase, receptor type, O                 | 5800      | 1,35 | 1,29E-05  |
| <i>LYN</i>          | v-yes-1 Yamaguchi sarcoma viral related oncogene ho            | 4067      | 1,35 | 1,41E-05  |
| <i>LOC100996579</i> | uncharacterized LOC100996579                                   | 100996579 | 1,35 | 5,08E-05  |
| <i>SGK223</i>       | homolog of rat pragma of Rnd2                                  | 157285    | 1,35 | 7,88E-05  |
| <i>ACPL2</i>        | acid phosphatase-like 2                                        | 92370     | 1,35 | 0,0006012 |
| <i>CDC42</i>        | cell division cycle 42 (GTP binding protein, 25kDa)            | 998       | 1,35 | 0,0007366 |
| <i>SGK3</i>         | serum/glucocorticoid regulated kinase family, member           | 23678     | 1,34 | 1,00E-07  |
| <i>TSTA3</i>        | tissue specific transplantation antigen P35B                   | 7264      | 1,34 | 2,43E-05  |
| <i>AP3M2</i>        | adaptor-related protein complex 3, mu 2 subunit                | 10947     | 1,34 | 4,64E-05  |
| <i>AGTBP1</i>       | ATP/GTP binding protein 1                                      | 23287     | 1,34 | 0,000164  |
| <i>MPP6</i>         | membrane protein, palmitoylated 6 (MAGUK p55 subf              | 51678     | 1,34 | 0,0003198 |
| <i>ARG2</i>         | arginase, type II                                              | 384       | 1,34 | 0,0004309 |

|                   |                                                             |           |      |           |
|-------------------|-------------------------------------------------------------|-----------|------|-----------|
| <i>RNASE4</i>     | ribonuclease, RNase A family, 4                             | 6038      | 1,34 | 0,0006554 |
| <i>CMTM4</i>      | CKLF-like MARVEL transmembrane domain containin             | 146223    | 1,33 | < 1e-07   |
| <i>EMC2</i>       | ER membrane protein complex subunit 2                       | 9694      | 1,33 | 1,00E-07  |
| <i>WDR47</i>      | WD repeat domain 47                                         | 22911     | 1,33 | 2,00E-07  |
| <i>TMEM68</i>     | transmembrane protein 68                                    | 137695    | 1,33 | 3,00E-07  |
| <i>LETM2</i>      | leucine zipper-EF-hand containing transmembrane pr          | 137994    | 1,33 | 1,20E-06  |
| <i>KIAA1551</i>   | KIAA1551                                                    | 55196     | 1,33 | 3,50E-06  |
| <i>RALA</i>       | v-ral simian leukemia viral oncogene homolog A (ras r       | 5898      | 1,33 | 0,000166  |
| <i>GNG2</i>       | guanine nucleotide binding protein (G protein), gamma       | 54331     | 1,33 | 0,000174  |
| <i>SLC25A32</i>   | solute carrier family 25 (mitochondrial folate carrier) , t | 81034     | 1,32 | < 1e-07   |
| <i>GNRH1</i>      | gonadotropin-releasing hormone 1 (luteinizing-releasi       | 2796      | 1,32 | < 1e-07   |
| <i>AKT3</i>       | v-akt murine thymoma viral oncogene homolog 3 (pro          | 10000     | 1,32 | 4,00E-07  |
| <i>TRMT12</i>     | tRNA methyltransferase 12 homolog (S. cerevisiae)           | 55039     | 1,32 | 1,00E-06  |
| <i>TRIQQ</i>      | triple QxxK/R motif containing                              | 286144    | 1,32 | 5,20E-06  |
| <i>C14orf129</i>  | chromosome 14 open reading frame 129                        | 51527     | 1,32 | 1,22E-05  |
| <i>IL7</i>        | interleukin 7                                               | 3574      | 1,32 | 6,03E-05  |
| <i>MANSC1</i>     | MANSC domain containing 1                                   | 54682     | 1,32 | 0,0006185 |
| <i>KIF18A</i>     | kinesin family member 18A                                   | 81930     | 1,32 | 0,0007483 |
| <i>PLEC</i>       | plectin                                                     | 5339      | 1,32 | 0,0008809 |
| <i>SORBS3</i>     | sorbin and SH3 domain containing 3                          | 10174     | 1,31 | < 1e-07   |
| <i>NEIL2</i>      | nei endonuclease VIII-like 2 (E. coli)                      | 252969    | 1,31 | < 1e-07   |
| <i>PPAPDC1B</i>   | phosphatidic acid phosphatase type 2 domain contain         | 84513     | 1,31 | < 1e-07   |
| <i>ATP6V1B2</i>   | ATPase, H+ transporting, lysosomal 56/58kDa, V1 sul         | 526       | 1,31 | 5,00E-07  |
| <i>LYPLA1</i>     | lysophospholipase I                                         | 10434     | 1,31 | 6,10E-06  |
| <i>DNAJB9</i>     | DnaJ (Hsp40) homolog, subfamily B, member 9                 | 4189      | 1,31 | 7,00E-06  |
| <i>CPED1</i>      | cadherin-like and PC-esterase domain containing 1           | 79974     | 1,31 | 4,72E-05  |
| <i>KLHDC7B</i>    | kelch domain containing 7B                                  | 113730    | 1,31 | 0,0001792 |
| <i>CYB5A</i>      | cytochrome b5 type A (microsomal)                           | 1528      | 1,31 | 0,0002164 |
| <i>DDIT4L</i>     | DNA-damage-inducible transcript 4-like                      | 115265    | 1,31 | 0,0008158 |
| <i>UBXN2B</i>     | UBX domain protein 2B                                       | 137886    | 1,3  | < 1e-07   |
| <i>UBR5</i>       | ubiquitin protein ligase E3 component n-recognin 5          | 51366     | 1,3  | < 1e-07   |
| <i>BAG4</i>       | BCL2-associated athanogene 4                                | 9530      | 1,3  | 6,00E-07  |
| <i>RDH10</i>      | retinol dehydrogenase 10 (all-trans)                        | 157506    | 1,3  | 7,20E-06  |
| <i>LRR8C</i>      | leucine rich repeat containing 8 family, member C           | 84230     | 1,3  | 2,05E-05  |
| <i>MRPS28</i>     | mitochondrial ribosomal protein S28                         | 28957     | 1,3  | 5,28E-05  |
| <i>LOC1009965</i> | uncharacterized LOC100996537                                | 100996537 | 1,3  | 0,0001204 |
| <i>RAP2A</i>      | RAP2A, member of RAS oncogene family                        | 5911      | 1,3  | 0,0001218 |
| <i>MCM4</i>       | minichromosome maintenance complex component 4              | 4173      | 1,3  | 0,0004175 |
| <i>C8orf82</i>    | chromosome 8 open reading frame 82                          | 414919    | 1,3  | 0,0004281 |
| <i>NUDT4</i>      | nudix (nucleoside diphosphate linked moiety X)-type r       | 11163     | 1,3  | 0,0005372 |
| <i>LOC1009964</i> | uncharacterized LOC100996412                                | 100996412 | 1,3  | 0,0007649 |
| <i>PPP1R27</i>    | protein phosphatase 1, regulatory subunit 27                | 116729    | 1,3  | 0,0009549 |
| <i>RNF19A</i>     | ring finger protein 19A, E3 ubiquitin protein ligase        | 25897     | 1,29 | < 1e-07   |
| <i>LOC1005073</i> | uncharacterized LOC100507316                                | 100507316 | 1,29 | < 1e-07   |
| <i>MTRF1</i>      | mitochondrial fission regulator 1                           | 9650      | 1,29 | < 1e-07   |
| <i>SPCS2</i>      | signal peptidase complex subunit 2 homolog (S. cerev        | 9789      | 1,29 | 2,00E-07  |
| <i>DCTN6</i>      | dynactin 6                                                  | 10671     | 1,29 | 4,00E-07  |
| <i>RBM12B</i>     | RNA binding motif protein 12B                               | 389677    | 1,29 | 6,00E-07  |
| <i>IMPA1</i>      | inositol(myo)-1(or 4)-monophosphatase 1                     | 3612      | 1,29 | 3,80E-06  |
| <i>LOC1001288</i> | uncharacterized LOC100128822                                | 100128822 | 1,29 | 1,20E-05  |
| <i>TBL2</i>       | transducin (beta)-like 2                                    | 26608     | 1,29 | 2,15E-05  |
| <i>SESN3</i>      | sestrin 3                                                   | 143686    | 1,29 | 3,46E-05  |
| <i>ADCY9</i>      | adenylate cyclase 9                                         | 115       | 1,29 | 0,000114  |
| <i>F8</i>         | coagulation factor VIII, procoagulant component             | 2157      | 1,29 | 0,0001509 |
| <i>SAMD9</i>      | sterile alpha motif domain containing 9                     | 54809     | 1,29 | 0,0004403 |

|                     |                                                           |           |      |           |
|---------------------|-----------------------------------------------------------|-----------|------|-----------|
| <i>KIF13B</i>       | kinesin family member 13B                                 | 23303     | 1,28 | < 1e-07   |
| <i>FNTA</i>         | farnesyltransferase, CAAX box, alpha                      | 2339      | 1,28 | < 1e-07   |
| <i>VPS13B</i>       | vacuolar protein sorting 13 homolog B (yeast)             | 157680    | 1,28 | 1,70E-06  |
| <i>ANKRD6</i>       | ankyrin repeat domain 6                                   | 22881     | 1,28 | 6,08E-05  |
| <i>CMTM8</i>        | CKLF-like MARVEL transmembrane domain containin           | 152189    | 1,28 | 8,38E-05  |
| <i>C12orf29</i>     | chromosome 12 open reading frame 29                       | 91298     | 1,28 | 0,0002642 |
| <i>TMEM45A</i>      | transmembrane protein 45A                                 | 55076     | 1,28 | 0,0003373 |
| <i>MICAL2</i>       | microtubule associated monooxygenase, calponin and        | 9645      | 1,28 | 0,0004686 |
| <i>PRDX4</i>        | peroxiredoxin 4                                           | 10549     | 1,28 | 0,000612  |
| <i>CRTAM</i>        | cytotoxic and regulatory T cell molecule                  | 56253     | 1,28 | 0,0007397 |
| <i>REEP5</i>        | receptor accessory protein 5                              | 7905      | 1,28 | 0,0007711 |
| <i>AGPAT5</i>       | 1-acylglycerol-3-phosphate O-acyltransferase 5 (lysop     | 55326     | 1,28 | 0,0009867 |
| <i>MED30</i>        | mediator complex subunit 30                               | 90390     | 1,27 | 1,00E-07  |
| <i>PPP2R2A</i>      | protein phosphatase 2, regulatory subunit B, alpha        | 5520      | 1,27 | 1,00E-07  |
| <i>C8orf59</i>      | chromosome 8 open reading frame 59                        | 401466    | 1,27 | 2,80E-06  |
| <i>DECR1</i>        | 2,4-dienoyl CoA reductase 1, mitochondrial                | 1666      | 1,27 | 3,90E-06  |
| <i>LYPLAL1</i>      | lysophospholipase-like 1                                  | 127018    | 1,27 | 4,90E-06  |
| <i>GAN</i>          | gigaxonin                                                 | 8139      | 1,27 | 2,67E-05  |
| <i>PRKDC</i>        | protein kinase, DNA-activated, catalytic polypeptide      | 5591      | 1,27 | 3,56E-05  |
| <i>YTHDF3</i>       | YTH domain family, member 3                               | 253943    | 1,27 | 4,62E-05  |
| <i>PODXL</i>        | podocalyxin-like                                          | 5420      | 1,27 | 8,15E-05  |
| <i>SLC16A10</i>     | solute carrier family 16, member 10 (aromatic amino a     | 117247    | 1,27 | 0,000215  |
| <i>SBF2</i>         | SET binding factor 2                                      | 81846     | 1,27 | 0,000255  |
| <i>DGAT2</i>        | diacylglycerol O-acyltransferase 2                        | 84649     | 1,27 | 0,000276  |
| <i>ZBTB41</i>       | zinc finger and BTB domain containing 41                  | 360023    | 1,27 | 0,000451  |
| <i>MB21D1</i>       | Mab-21 domain containing 1                                | 115004    | 1,27 | 0,0008142 |
| <i>ANKRD28</i>      | ankyrin repeat domain 28                                  | 23243     | 1,27 | 0,0009003 |
| <i>LRRCC1</i>       | leucine rich repeat and coiled-coil centrosomal protein   | 85444     | 1,27 | 0,0009174 |
| <i>CNOT7</i>        | CCR4-NOT transcription complex, subunit 7                 | 29883     | 1,26 | 1,00E-07  |
| <i>TRIM35</i>       | tripartite motif containing 35                            | 23087     | 1,26 | 3,00E-07  |
| <i>MTMR9</i>        | myotubularin related protein 9                            | 66036     | 1,26 | 1,60E-06  |
| <i>C8orf44-SGK3</i> | C8orf44-SGK3 readthrough                                  | 100533105 | 1,26 | 2,00E-06  |
| <i>FBXO25</i>       | F-box protein 25                                          | 26260     | 1,26 | 3,90E-06  |
| <i>ERI1</i>         | exoribonuclease 1                                         | 90459     | 1,26 | 1,14E-05  |
| <i>PHTF2</i>        | putative homeodomain transcription factor 2               | 57157     | 1,26 | 1,57E-05  |
| <i>TATDN3</i>       | TatD DNase domain containing 3                            | 128387    | 1,26 | 2,02E-05  |
| <i>NUDT19</i>       | nudix (nucleoside diphosphate linked moiety X)-type r     | 390916    | 1,26 | 2,26E-05  |
| <i>FBXO8</i>        | F-box protein 8                                           | 26269     | 1,26 | 2,65E-05  |
| <i>SQLE</i>         | squalene epoxidase                                        | 6713      | 1,26 | 0,0001325 |
| <i>EIF4EBP1</i>     | eukaryotic translation initiation factor 4E binding prote | 1978      | 1,26 | 0,0001528 |
| <i>TMEM64</i>       | transmembrane protein 64                                  | 169200    | 1,26 | 0,0002045 |
| <i>KLHDC8B</i>      | kelch domain containing 8B                                | 200942    | 1,26 | 0,0002854 |
| <i>ZBED6</i>        | zinc finger, BED-type containing 6                        | 100381270 | 1,26 | 0,0003178 |
| <i>XPO7</i>         | exportin 7                                                | 23039     | 1,26 | 0,000319  |
| <i>BNIP3L</i>       | BCL2/adenovirus E1B 19kDa interacting protein 3-like      | 665       | 1,26 | 0,0005603 |
| <i>CD3E</i>         | CD3e molecule, epsilon (CD3-TCR complex)                  | 916       | 1,26 | 0,0006372 |
| <i>CHSY1</i>        | chondroitin sulfate synthase 1                            | 22856     | 1,26 | 0,0006855 |
| <i>ZNF34</i>        | zinc finger protein 34                                    | 80778     | 1,25 | 9,00E-07  |
| <i>TATDN1</i>       | TatD DNase domain containing 1                            | 83940     | 1,25 | 3,40E-06  |
| <i>SEC62</i>        | SEC62 homolog (S. cerevisiae)                             | 7095      | 1,25 | 4,10E-06  |
| <i>NAA30</i>        | N(alpha)-acetyltransferase 30, NatC catalytic subunit     | 122830    | 1,25 | 3,35E-05  |
| <i>KIAA0232</i>     | KIAA0232                                                  | 9778      | 1,25 | 4,12E-05  |
| <i>PNOC</i>         | prepronociceptin                                          | 5368      | 1,25 | 8,09E-05  |
| <i>RIPK2</i>        | receptor-interacting serine-threonine kinase 2            | 8767      | 1,25 | 8,86E-05  |
| <i>CHST2</i>        | carbohydrate (N-acetylglucosamine-6-O) sulfotransfer      | 9435      | 1,25 | 0,0002641 |

|                     |                                                                      |           |      |           |
|---------------------|----------------------------------------------------------------------|-----------|------|-----------|
| <i>TNFRSF10D</i>    | tumor necrosis factor receptor superfamily, member 10                | 8793      | 1,25 | 0,0004812 |
| <i>ZNF395</i>       | zinc finger protein 395                                              | 55893     | 1,25 | 0,0005219 |
| <i>KCTD3</i>        | potassium channel tetramerisation domain containing 3                | 51133     | 1,25 | 0,0005358 |
| <i>SLC17A5</i>      | solute carrier family 17 (anion/sugar transporter), member 5         | 26503     | 1,25 | 0,0007034 |
| <i>OLFML3</i>       | olfactomedin-like 3                                                  | 56944     | 1,25 | 0,0007414 |
| <i>SOCS6</i>        | suppressor of cytokine signaling 6                                   | 9306      | 1,25 | 0,000816  |
| <i>PRRG4</i>        | proline rich Gla (G-carboxyglutamic acid) 4 (transmembrane protein)  | 79056     | 1,25 | 0,0008639 |
| <i>ERGIC2</i>       | ERGIC and golgi 2                                                    | 51290     | 1,24 | 7,00E-06  |
| <i>MUT</i>          | methylmalonyl CoA mutase                                             | 4594      | 1,24 | 1,28E-05  |
| <i>RNF14</i>        | ring finger protein 14                                               | 9604      | 1,24 | 2,45E-05  |
| <i>NBN</i>          | nibrin                                                               | 4683      | 1,24 | 2,54E-05  |
| <i>SREK1IP1</i>     | SREK1-interacting protein 1                                          | 285672    | 1,24 | 3,72E-05  |
| <i>RNF141</i>       | ring finger protein 141                                              | 50862     | 1,24 | 6,63E-05  |
| <i>SLC16A7</i>      | solute carrier family 16, member 7 (monocarboxylic acid transporter) | 9194      | 1,24 | 0,0001432 |
| <i>SH3RF1</i>       | SH3 domain containing ring finger 1                                  | 57630     | 1,24 | 0,0001546 |
| <i>SNTB1</i>        | syntrophin, beta 1 (dystrophin-associated protein A1, 4)             | 6641      | 1,24 | 0,0001936 |
| <i>AIM2</i>         | absent in melanoma 2                                                 | 9447      | 1,24 | 0,0003731 |
| <i>HSPA13</i>       | heat shock protein 70kDa family, member 13                           | 6782      | 1,24 | 0,000504  |
| <i>KPNA2</i>        | karyopherin alpha 2 (RAG cohort 1, importin alpha 1)                 | 3838      | 1,24 | 0,0009012 |
| <i>CISH</i>         | cytokine inducible SH2-containing protein                            | 1154      | 1,24 | 0,0009656 |
| <i>GPAAL1</i>       | glycosylphosphatidylinositol anchor attachment protein 1             | 8733      | 1,23 | 6,00E-07  |
| <i>INTS9</i>        | integrator complex subunit 9                                         | 55756     | 1,23 | 7,00E-07  |
| <i>FAM175B</i>      | family with sequence similarity 175, member B                        | 23172     | 1,23 | 4,40E-06  |
| <i>KIFC2</i>        | kinesin family member C2                                             | 90990     | 1,23 | 3,08E-05  |
| <i>MSRA</i>         | methionine sulfoxide reductase A                                     | 4482      | 1,23 | 4,19E-05  |
| <i>LSM5</i>         | LSM5 homolog, U6 small nuclear RNA associated (S. cerevisiae)        | 23658     | 1,23 | 4,28E-05  |
| <i>CEP85L</i>       | centrosomal protein 85kDa-like                                       | 387119    | 1,23 | 4,74E-05  |
| <i>SEMA4C</i>       | sema domain, immunoglobulin domain (Ig), transmembrane protein       | 54910     | 1,23 | 0,0001424 |
| <i>C6orf57</i>      | chromosome 6 open reading frame 57                                   | 135154    | 1,23 | 0,0001929 |
| <i>NCOA2</i>        | nuclear receptor coactivator 2                                       | 10499     | 1,23 | 0,0002288 |
| <i>IPW</i>          | imprinted in Prader-Willi syndrome (non-protein coding)              | 3653      | 1,23 | 0,0003932 |
| <i>SUMO1</i>        | SMT3 suppressor of mif two 3 homolog 1 (S. cerevisiae)               | 7341      | 1,23 | 0,0005031 |
| <i>IMPACT</i>       | Impact homolog (mouse)                                               | 55364     | 1,23 | 0,0009004 |
| <i>INTS6</i>        | integrator complex subunit 6                                         | 26512     | 1,23 | 0,0009318 |
| <i>ZNF252P</i>      | zinc finger protein 252, pseudogene                                  | 286101    | 1,22 | 3,00E-06  |
| <i>MAK16</i>        | MAK16 homolog (S. cerevisiae)                                        | 84549     | 1,22 | 7,00E-06  |
| <i>LOC100506295</i> | uncharacterized LOC100506295                                         | 100506295 | 1,22 | 2,41E-05  |
| <i>SLC39A14</i>     | solute carrier family 39 (zinc transporter), member 14               | 23516     | 1,22 | 2,47E-05  |
| <i>ZNF596</i>       | zinc finger protein 596                                              | 169270    | 1,22 | 2,50E-05  |
| <i>FAM116A</i>      | family with sequence similarity 116, member A                        | 201627    | 1,22 | 4,23E-05  |
| <i>TXNDC9</i>       | thioredoxin domain containing 9                                      | 10190     | 1,22 | 5,08E-05  |
| <i>ELP3</i>         | elongator acetyltransferase complex subunit 3                        | 55140     | 1,22 | 5,56E-05  |
| <i>INIP</i>         | INTS3 and NABP interacting protein                                   | 58493     | 1,22 | 8,78E-05  |
| <i>RBM43</i>        | RNA binding motif protein 43                                         | 375287    | 1,22 | 9,07E-05  |
| <i>UBXN8</i>        | UBX domain protein 8                                                 | 7993      | 1,22 | 0,0001048 |
| <i>WBP2</i>         | WW domain binding protein 2                                          | 23558     | 1,22 | 0,0001699 |
| <i>LEMD3</i>        | LEM domain containing 3                                              | 23592     | 1,22 | 0,0002068 |
| <i>GSTA4</i>        | glutathione S-transferase alpha 4                                    | 2941      | 1,22 | 0,000208  |
| <i>SERAC1</i>       | serine active site containing 1                                      | 84947     | 1,22 | 0,0002268 |
| <i>STXBP3</i>       | syntaxin binding protein 3                                           | 6814      | 1,22 | 0,0002573 |
| <i>COL4A3BP</i>     | collagen, type IV, alpha 3 (Goodpasture antigen) binding protein     | 10087     | 1,22 | 0,0002911 |
| <i>LPHN1</i>        | latrophilin 1                                                        | 22859     | 1,22 | 0,0003464 |
| <i>RBMXL1</i>       | RNA binding motif protein, X-linked-like 1                           | 494115    | 1,22 | 0,0006018 |
| <i>PSAT1</i>        | phosphoserine aminotransferase 1                                     | 29968     | 1,22 | 0,0006332 |
| <i>DNAJC3</i>       | DnaJ (Hsp40) homolog, subfamily C, member 3                          | 5611      | 1,22 | 0,0006627 |

|                      |                                                                 |           |      |           |
|----------------------|-----------------------------------------------------------------|-----------|------|-----------|
| <i>TSPAN14</i>       | tetraspanin 14                                                  | 81619     | 1,22 | 0,0007143 |
| <i>CSPP1</i>         | centrosome and spindle pole associated protein 1                | 79848     | 1,21 | 1,74E-05  |
| <i>DGAT1</i>         | diacylglycerol O-acyltransferase 1                              | 8694      | 1,21 | 5,48E-05  |
| <i>PPDPF</i>         | pancreatic progenitor cell differentiation and proliferation    | 79144     | 1,21 | 7,90E-05  |
| <i>SLU7</i>          | SLU7 splicing factor homolog ( <i>S. cerevisiae</i> )           | 10569     | 1,21 | 9,08E-05  |
| <i>MRAS</i>          | muscle RAS oncogene homolog                                     | 22808     | 1,21 | 9,21E-05  |
| <i>ZNF143</i>        | zinc finger protein 143                                         | 7702      | 1,21 | 0,0001588 |
| <i>HELB</i>          | helicase (DNA) B                                                | 92797     | 1,21 | 0,0001663 |
| <i>INTS10</i>        | integrator complex subunit 10                                   | 55174     | 1,21 | 0,0002032 |
| <i>SMC3</i>          | structural maintenance of chromosomes 3                         | 9126      | 1,21 | 0,0002438 |
| <i>ASS1</i>          | argininosuccinate synthase 1                                    | 445       | 1,21 | 0,0003064 |
| <i>GOLGA5</i>        | golgin A5                                                       | 9950      | 1,21 | 0,0005105 |
| <i>CSTF2T</i>        | cleavage stimulation factor, 3' pre-RNA, subunit 2, 64kDa       | 23283     | 1,21 | 0,0005641 |
| <i>SDHD</i>          | succinate dehydrogenase complex, subunit D, integral membrane   | 6392      | 1,21 | 0,0007262 |
| <i>CTNNA1</i>        | catenin (cadherin-associated protein), alpha 1, 102kDa          | 1495      | 1,21 | 0,0008518 |
| <i>RFWD3</i>         | ring finger and WD repeat domain 3                              | 55159     | 1,21 | 0,00089   |
| <i>RNF166</i>        | ring finger protein 166                                         | 115992    | 1,21 | 0,0008909 |
| <i>ALDH9A1</i>       | aldehyde dehydrogenase 9 family, member A1                      | 223       | 1,2  | 1,32E-05  |
| <i>EIF3E</i>         | eukaryotic translation initiation factor 3, subunit E           | 3646      | 1,2  | 5,93E-05  |
| <i>HIGD1A</i>        | HIG1 hypoxia inducible domain family, member 1A                 | 25994     | 1,2  | 6,67E-05  |
| <i>BCL9L</i>         | B-cell CLL/lymphoma 9-like                                      | 283149    | 1,2  | 0,0001401 |
| <i>DHX29</i>         | DEAH (Asp-Glu-Ala-His) box polypeptide 29                       | 54505     | 1,2  | 0,0001807 |
| <i>ZNF426</i>        | zinc finger protein 426                                         | 79088     | 1,2  | 0,0002077 |
| <i>LEPROTL1</i>      | leptin receptor overlapping transcript-like 1                   | 23484     | 1,2  | 0,0002795 |
| <i>LOC100506100</i>  | uncharacterized LOC100506100                                    | 100506100 | 1,2  | 0,0002947 |
| <i>MAP1S</i>         | microtubule-associated protein 1S                               | 55201     | 1,2  | 0,0002958 |
| <i>RAB7L1</i>        | RAB7, member RAS oncogene family-like 1                         | 8934      | 1,2  | 0,0004074 |
| <i>CNTLN</i>         | centlein, centrosomal protein                                   | 54875     | 1,2  | 0,0004193 |
| <i>SLK</i>           | STE20-like kinase                                               | 9748      | 1,2  | 0,0004723 |
| <i>USP8</i>          | ubiquitin specific peptidase 8                                  | 9101      | 1,2  | 0,0004723 |
| <i>MICB</i>          | MHC class I polypeptide-related sequence B                      | 4277      | 1,2  | 0,0005133 |
| <i>SGTB</i>          | small glutamine-rich tetratricopeptide repeat (TPR)-containing  | 54557     | 1,2  | 0,0006688 |
| <i>ACAT1</i>         | acetyl-CoA acetyltransferase 1                                  | 38        | 1,2  | 0,0007354 |
| <i>PEX12</i>         | peroxisomal biogenesis factor 12                                | 5193      | 1,19 | 7,68E-05  |
| <i>ZBTB2</i>         | zinc finger and BTB domain containing 2                         | 57621     | 1,19 | 8,94E-05  |
| <i>INTS8</i>         | integrator complex subunit 8                                    | 55656     | 1,19 | 0,0001513 |
| <i>KIAA1715</i>      | KIAA1715                                                        | 80856     | 1,19 | 0,0001525 |
| <i>GLO1</i>          | glyoxalase I                                                    | 2739      | 1,19 | 0,0004594 |
| <i>GNG10</i>         | guanine nucleotide binding protein (G protein), gamma 10        | 2790      | 1,19 | 0,0005344 |
| <i>DNAJC25-GNG10</i> | DNAJC25-GNG10 readthrough                                       | 552891    | 1,19 | 0,0005344 |
| <i>SLC31A1</i>       | solute carrier family 31 (copper transporters), member 1        | 1317      | 1,19 | 0,0007022 |
| <i>KBTBD3</i>        | kelch repeat and BTB (POZ) domain containing 3                  | 143879    | 1,19 | 0,0007528 |
| <i>PLEKHF2</i>       | pleckstrin homology domain containing, family F (with forkhead) | 79666     | 1,19 | 0,000753  |
| <i>PALM</i>          | paralemmin                                                      | 5064      | 1,19 | 0,0007542 |
| <i>ZNF552</i>        | zinc finger protein 552                                         | 79818     | 1,19 | 0,0008303 |
| <i>TMEM69</i>        | transmembrane protein 69                                        | 51249     | 1,19 | 0,0008512 |
| <i>CASP7</i>         | caspase 7, apoptosis-related cysteine peptidase                 | 840       | 1,19 | 0,0009789 |
| <i>TBC1D15</i>       | TBC1 domain family, member 15                                   | 64786     | 1,18 | 4,48E-05  |
| <i>DSN1</i>          | DSN1, MIND kinetochore complex component, homologous to         | 79980     | 1,18 | 8,11E-05  |
| <i>MCMBP</i>         | minichromosome maintenance complex binding protein              | 79892     | 1,18 | 0,0002301 |
| <i>ATL3</i>          | atlastin GTPase 3                                               | 25923     | 1,18 | 0,0003477 |
| <i>VHL</i>           | von Hippel-Lindau tumor suppressor, E3 ubiquitin protein        | 7428      | 1,18 | 0,0004144 |
| <i>XAB2</i>          | XPA binding protein 2                                           | 56949     | 1,18 | 0,0005441 |
| <i>KCTD18</i>        | potassium channel tetramerisation domain containing 18          | 130535    | 1,18 | 0,0005833 |
| <i>07-Mar</i>        | membrane-associated ring finger (C3HC4) 7, E3 ubiquitin         | 64844     | 1,18 | 0,0008059 |



|                     |                                                       |           |      |           |
|---------------------|-------------------------------------------------------|-----------|------|-----------|
| <i>DCUN1D5</i>      | DCN1, defective in cullin neddylation 1, domain conta | 84259     | 1,17 | 0,0002026 |
| <i>PTK2B</i>        | PTK2B protein tyrosine kinase 2 beta                  | 2185      | 1,17 | 0,000262  |
| <i>ACN9</i>         | ACN9 homolog (S. cerevisiae)                          | 57001     | 1,17 | 0,0005377 |
| <i>ENTPD4</i>       | ectonucleoside triphosphate diphosphohydrolase 4      | 9583      | 1,17 | 0,0006375 |
| <i>CYP3A5</i>       | cytochrome P450, family 3, subfamily A, polypeptide 5 | 1577      | 1,17 | 0,0006437 |
| <i>CBR3</i>         | carbonyl reductase 3                                  | 874       | 1,17 | 0,0009724 |
| <i>SDHC</i>         | succinate dehydrogenase complex, subunit C, integra   | 6391      | 1,17 | 0,0009971 |
| <i>AKIP1</i>        | A kinase (PRKA) interacting protein 1                 | 56672     | 1,16 | 0,0004523 |
| <i>ASH2L</i>        | ash2 (absent, small, or homeotic)-like (Drosophila)   | 9070      | 1,16 | 0,0004553 |
| <i>UCHL5</i>        | ubiquitin carboxyl-terminal hydrolase L5              | 51377     | 1,16 | 0,0005263 |
| <i>MBIP</i>         | MAP3K12 binding inhibitory protein 1                  | 51562     | 1,16 | 0,0006635 |
| <i>HPS5</i>         | Hermansky-Pudlak syndrome 5                           | 11234     | 1,16 | 0,0007002 |
| <i>ZC3H3</i>        | zinc finger CCCH-type containing 3                    | 23144     | 1,16 | 0,0007225 |
| <i>USP31</i>        | ubiquitin specific peptidase 31                       | 57478     | 1,16 | 0,0007829 |
| <i>EXOC5</i>        | exocyst complex component 5                           | 10640     | 1,16 | 0,0008463 |
| <i>CCDC90B</i>      | coiled-coil domain containing 90B                     | 60492     | 1,16 | 0,0008748 |
| <i>PRKCA</i>        | protein kinase C, alpha                               | 5578      | 1,15 | 0,0009343 |
| <i>SPG7</i>         | spastic paraplegia 7 (pure and complicated automa     | 6687      | 0,87 | 0,0003797 |
| <i>ZNF496</i>       | zinc finger protein 496                               | 84838     | 0,87 | 0,0003927 |
| <i>CLK2</i>         | CDC-like kinase 2                                     | 1196      | 0,87 | 0,0005333 |
| <i>ZNF428</i>       | zinc finger protein 428                               | 126299    | 0,87 | 0,0005392 |
| <i>MIA-RAB4B</i>    | MIA-RAB4B readthrough                                 | 100529262 | 0,87 | 0,0005737 |
| <i>LRRC23</i>       | leucine rich repeat containing 23                     | 10233     | 0,87 | 0,0007427 |
| <i>CABIN1</i>       | calcineurin binding protein 1                         | 23523     | 0,87 | 0,0009965 |
| <i>LOC10013283</i>  | PMS2 postmeiotic segregation increased 2 (S. cerevis  | 100132832 | 0,86 | 0,000299  |
| <i>CDK11B</i>       | cyclin-dependent kinase 11B                           | 984       | 0,86 | 0,0003009 |
| <i>CHKA</i>         | choline kinase alpha                                  | 1119      | 0,86 | 0,0003741 |
| <i>ALDH16A1</i>     | aldehyde dehydrogenase 16 family, member A1           | 126133    | 0,86 | 0,0003757 |
| <i>TTL3</i>         | tubulin tyrosine ligase-like family, member 3         | 26140     | 0,86 | 0,0003845 |
| <i>FAM219B</i>      | family with sequence similarity 219, member B         | 57184     | 0,86 | 0,0004392 |
| <i>NR1H2</i>        | nuclear receptor subfamily 1, group H, member 2       | 7376      | 0,86 | 0,0004402 |
| <i>PDDC1</i>        | Parkinson disease 7 domain containing 1               | 347862    | 0,86 | 0,0004485 |
| <i>AKT1</i>         | v-akt murine thymoma viral oncogene homolog 1         | 207       | 0,86 | 0,0005124 |
| <i>DCAF4</i>        | DDB1 and CUL4 associated factor 4                     | 26094     | 0,86 | 0,0005423 |
| <i>SAP25</i>        | Sin3A-associated protein, 25kDa                       | 100316904 | 0,86 | 0,000554  |
| <i>SUGP2</i>        | SURP and G patch domain containing 2                  | 10147     | 0,86 | 0,0006294 |
| <i>HP07349</i>      | uncharacterized LOC100652853                          | 100652853 | 0,86 | 0,0006499 |
| <i>COMMD1</i>       | copper metabolism (Murr1) domain containing 1         | 150684    | 0,86 | 0,0006729 |
| <i>KIAA0100</i>     | KIAA0100                                              | 9703      | 0,86 | 0,000723  |
| <i>ANKMY1</i>       | ankyrin repeat and MYND domain containing 1           | 51281     | 0,86 | 0,0007327 |
| <i>NSUN5</i>        | NOP2/Sun domain family, member 5                      | 55695     | 0,86 | 0,0007654 |
| <i>SYNCRIP</i>      | synaptotagmin binding, cytoplasmic RNA interacting p  | 10492     | 0,86 | 0,0008918 |
| <i>PPIB</i>         | peptidylprolyl isomerase B (cyclophilin B)            | 5479      | 0,86 | 0,0009342 |
| <i>EEF2K</i>        | eukaryotic elongation factor-2 kinase                 | 29904     | 0,86 | 0,0009444 |
| <i>LYPLA2</i>       | lysophospholipase II                                  | 11313     | 0,86 | 0,0009454 |
| <i>PTBP1</i>        | polypyrimidine tract binding protein 1                | 5725      | 0,85 | 6,30E-05  |
| <i>LOC100507424</i> | uncharacterized LOC100507424                          | 100507424 | 0,85 | 7,63E-05  |
| <i>PRPF3</i>        | PRP3 pre-mRNA processing factor 3 homolog (S. cer     | 9129      | 0,85 | 7,87E-05  |
| <i>SEC24C</i>       | SEC24 family, member C (S. cerevisiae)                | 9632      | 0,85 | 9,52E-05  |
| <i>DKC1</i>         | dyskeratosis congenita 1, dyskerin                    | 1736      | 0,85 | 0,0001548 |
| <i>CIB1</i>         | calcium and integrin binding 1 (calmyrin)             | 10519     | 0,85 | 0,0001581 |
| <i>AGBL5</i>        | ATP/GTP binding protein-like 5                        | 60509     | 0,85 | 0,0001726 |
| <i>HNRNPA2B1</i>    | heterogeneous nuclear ribonucleoprotein A2/B1         | 3181      | 0,85 | 0,0001867 |
| <i>MOGS</i>         | mannosyl-oligosaccharide glucosidase                  | 7841      | 0,85 | 0,0002136 |
| <i>MFGE8</i>        | milk fat globule-EGF factor 8 protein                 | 4240      | 0,85 | 0,0002181 |

|                      |                                                                  |           |      |           |
|----------------------|------------------------------------------------------------------|-----------|------|-----------|
| <i>BMS1</i>          | BMS1 homolog, ribosome assembly protein (yeast)                  | 9790      | 0,85 | 0,000244  |
| <i>SRSF6</i>         | serine/arginine-rich splicing factor 6                           | 6431      | 0,85 | 0,0002941 |
| <i>GAL3ST4</i>       | galactose-3-O-sulfotransferase 4                                 | 79690     | 0,85 | 0,0003037 |
| <i>BCAS3</i>         | breast carcinoma amplified sequence 3                            | 54828     | 0,85 | 0,0003071 |
| <i>TRIM45</i>        | tripartite motif containing 45                                   | 80263     | 0,85 | 0,0003123 |
| <i>SLC25A28</i>      | solute carrier family 25 (mitochondrial iron transporter)        | 81894     | 0,85 | 0,0003241 |
| <i>C10orf2</i>       | chromosome 10 open reading frame 2                               | 56652     | 0,85 | 0,0004131 |
| <i>ZNF26</i>         | zinc finger protein 26                                           | 7574      | 0,85 | 0,0004715 |
| <i>LOC1002875</i>    | zinc finger protein 26-like                                      | 100287515 | 0,85 | 0,0004715 |
| <i>POLG2</i>         | polymerase (DNA directed), gamma 2, accessory subunit            | 11232     | 0,85 | 0,0005455 |
| <i>APOC4-APOC2</i>   | APOC4-APOC2 readthrough                                          | 100533990 | 0,85 | 0,0008569 |
| <i>SAPCD1</i>        | suppressor APC domain containing 1                               | 401251    | 0,85 | 0,0008669 |
| <i>AKD1</i>          | adenylate kinase domain containing 1                             | 221264    | 0,85 | 0,0008714 |
| <i>C19orf45</i>      | chromosome 19 open reading frame 45                              | 374877    | 0,85 | 0,0008728 |
| <i>TMEM160</i>       | transmembrane protein 160                                        | 54958     | 0,85 | 0,0009188 |
| <i>CCDC22</i>        | coiled-coil domain containing 22                                 | 28952     | 0,85 | 0,0009834 |
| <i>COPG1</i>         | coatamer protein complex, subunit gamma 1                        | 22820     | 0,84 | 7,70E-06  |
| <i>TBC1D9B</i>       | TBC1 domain family, member 9B (with GRAM domain)                 | 23061     | 0,84 | 1,23E-05  |
| <i>SNRNP70</i>       | small nuclear ribonucleoprotein 70kDa (U1)                       | 6625      | 0,84 | 1,24E-05  |
| <i>TMEM198B</i>      | transmembrane protein 198B, pseudogene                           | 440104    | 0,84 | 2,65E-05  |
| <i>DIDO1</i>         | death inducer-obliterator 1                                      | 11083     | 0,84 | 3,17E-05  |
| <i>DNAJC17</i>       | DnaJ (Hsp40) homolog, subfamily C, member 17                     | 55192     | 0,84 | 3,17E-05  |
| <i>ASPSCR1</i>       | alveolar soft part sarcoma chromosome region, candidate 1        | 79058     | 0,84 | 4,58E-05  |
| <i>MGEA5</i>         | meningioma expressed antigen 5 (hyaluronidase)                   | 10724     | 0,84 | 4,86E-05  |
| <i>ARPC4</i>         | actin related protein 2/3 complex, subunit 4, 20kDa              | 10093     | 0,84 | 4,87E-05  |
| <i>TMEM91</i>        | transmembrane protein 91                                         | 641649    | 0,84 | 5,25E-05  |
| <i>NAP1L4</i>        | nucleosome assembly protein 1-like 4                             | 4676      | 0,84 | 5,76E-05  |
| <i>IFI27L2</i>       | interferon, alpha-inducible protein 27-like 2                    | 83982     | 0,84 | 9,23E-05  |
| <i>LIMD1</i>         | LIM domains containing 1                                         | 8994      | 0,84 | 9,81E-05  |
| <i>GLMN</i>          | glomulin, FKBP associated protein                                | 11146     | 0,84 | 0,0001366 |
| <i>SPATA7</i>        | spermatogenesis associated 7                                     | 55812     | 0,84 | 0,0001433 |
| <i>DCUN1D2</i>       | DCN1, defective in cullin neddylation 1, domain containing 2     | 55208     | 0,84 | 0,0001557 |
| <i>LOC100996421</i>  | uncharacterized LOC100996421                                     | 100996421 | 0,84 | 0,0001713 |
| <i>WRNIP1</i>        | Werner helicase interacting protein 1                            | 56897     | 0,84 | 0,0001769 |
| <i>CRIPAK</i>        | cysteine-rich PAK1 inhibitor                                     | 285464    | 0,84 | 0,0001849 |
| <i>FAM212A</i>       | family with sequence similarity 212, member A                    | 389119    | 0,84 | 0,0002246 |
| <i>DKFZP586I1420</i> | uncharacterized protein DKFZp586I1420                            | 222161    | 0,84 | 0,0002261 |
| <i>BCL2L2</i>        | BCL2-like 2                                                      | 599       | 0,84 | 0,000246  |
| <i>MFSD12</i>        | major facilitator superfamily domain containing 12               | 126321    | 0,84 | 0,0002564 |
| <i>CDK11A</i>        | cyclin-dependent kinase 11A                                      | 728642    | 0,84 | 0,0002704 |
| <i>SWSAP1</i>        | SWIM-type zinc finger 7 associated protein 1                     | 126074    | 0,84 | 0,0002907 |
| <i>SUOX</i>          | sulfite oxidase                                                  | 6821      | 0,84 | 0,0003795 |
| <i>ABCC2</i>         | ATP-binding cassette, sub-family C (CFTR/MRP), member 2          | 1244      | 0,84 | 0,0003848 |
| <i>VILL</i>          | villin-like                                                      | 50853     | 0,84 | 0,0004557 |
| <i>SLC33A1</i>       | solute carrier family 33 (acetyl-CoA transporter), member 1      | 9197      | 0,84 | 0,000459  |
| <i>CDK19</i>         | cyclin-dependent kinase 19                                       | 23097     | 0,84 | 0,000488  |
| <i>MSH5-SAPCD1</i>   | MSH5-SAPCD1 readthrough (non-protein coding)                     | 100532732 | 0,84 | 0,0005116 |
| <i>MPZL1</i>         | myelin protein zero-like 1                                       | 9019      | 0,84 | 0,0005311 |
| <i>LSM2</i>          | LSM2 homolog, U6 small nuclear RNA associated (S. cerevisiae)    | 57819     | 0,84 | 0,0005825 |
| <i>FUS</i>           | fused in sarcoma                                                 | 2521      | 0,84 | 0,0005869 |
| <i>PPIEL</i>         | peptidylprolyl isomerase E-like pseudogene                       | 728448    | 0,84 | 0,0006301 |
| <i>PMS2P3</i>        | postmeiotic segregation increased 2 pseudogene 3                 | 5387      | 0,84 | 0,0007017 |
| <i>IFT172</i>        | intraflagellar transport 172 homolog (Chlamydomonas reinhardtii) | 26160     | 0,84 | 0,0007215 |
| <i>DNAJC2</i>        | DnaJ (Hsp40) homolog, subfamily C, member 2                      | 27000     | 0,84 | 0,0007919 |
| <i>LTB4R</i>         | leukotriene B4 receptor                                          | 1241      | 0,84 | 0,0009473 |

|                   |                                                          |           |      |           |
|-------------------|----------------------------------------------------------|-----------|------|-----------|
| <i>LIG3</i>       | ligase III, DNA, ATP-dependent                           | 3980      | 0,83 | 2,80E-06  |
| <i>ATXN2L</i>     | ataxin 2-like                                            | 11273     | 0,83 | 4,50E-06  |
| <i>TELO2</i>      | TEL2, telomere maintenance 2, homolog (S. cerevisia      | 9894      | 0,83 | 6,70E-06  |
| <i>THOC1</i>      | THO complex 1                                            | 9984      | 0,83 | 1,01E-05  |
| <i>ARHGAP4</i>    | Rho GTPase activating protein 4                          | 393       | 0,83 | 1,40E-05  |
| <i>TEKT4P2</i>    | tektin 4 pseudogene 2                                    | 100132288 | 0,83 | 2,59E-05  |
| <i>PMS2P1</i>     | postmeiotic segregation increased 2 pseudogene 1         | 5379      | 0,83 | 2,65E-05  |
| <i>ADPGK</i>      | ADP-dependent glucokinase                                | 83440     | 0,83 | 3,19E-05  |
| <i>PHKA2</i>      | phosphorylase kinase, alpha 2 (liver)                    | 5256      | 0,83 | 4,12E-05  |
| <i>FLJ23867</i>   | uncharacterized protein FLJ23867                         | 200058    | 0,83 | 4,52E-05  |
| <i>MBD6</i>       | methyl-CpG binding domain protein 6                      | 114785    | 0,83 | 5,29E-05  |
| <i>ZDHHC11</i>    | zinc finger, DHHC-type containing 11                     | 79844     | 0,83 | 6,59E-05  |
| <i>ARHGEF1</i>    | Rho guanine nucleotide exchange factor (GEF) 1           | 9138      | 0,83 | 6,80E-05  |
| <i>PTTG1IP</i>    | pituitary tumor-transforming 1 interacting protein       | 754       | 0,83 | 7,50E-05  |
| <i>CCDC28B</i>    | coiled-coil domain containing 28B                        | 79140     | 0,83 | 7,53E-05  |
| <i>CAPN11</i>     | calpain 11                                               | 11131     | 0,83 | 9,66E-05  |
| <i>RPS6KL1</i>    | ribosomal protein S6 kinase-like 1                       | 83694     | 0,83 | 0,0001063 |
| <i>IFT122</i>     | intraflagellar transport 122 homolog (Chlamydomonas      | 55764     | 0,83 | 0,0001087 |
| <i>LOC728537</i>  | uncharacterized LOC728537                                | 728537    | 0,83 | 0,0001449 |
| <i>DYX1C1</i>     | dyslexia susceptibility 1 candidate 1                    | 161582    | 0,83 | 0,000161  |
| <i>PCGF3</i>      | polycomb group ring finger 3                             | 10336     | 0,83 | 0,0002403 |
| <i>GOLGA2P5</i>   | golgin A2 pseudogene 5                                   | 55592     | 0,83 | 0,0004384 |
| <i>THOC6</i>      | THO complex 6 homolog (Drosophila)                       | 79228     | 0,83 | 0,0005134 |
| <i>ZSCAN2</i>     | zinc finger and SCAN domain containing 2                 | 54993     | 0,83 | 0,0005611 |
| <i>POLR3E</i>     | polymerase (RNA) III (DNA directed) polypeptide E (8     | 55718     | 0,83 | 0,000565  |
| <i>RNPEP</i>      | arginyl aminopeptidase (aminopeptidase B)                | 6051      | 0,83 | 0,0007249 |
| <i>PVRL1</i>      | poliovirus receptor-related 1 (herpesvirus entry media   | 5818      | 0,83 | 0,0007315 |
| <i>AHI1</i>       | Abelson helper integration site 1                        | 54806     | 0,83 | 0,0007958 |
| <i>KCNMB3</i>     | potassium large conductance calcium-activated chanr      | 27094     | 0,83 | 0,0009812 |
| <i>C16orf58</i>   | chromosome 16 open reading frame 58                      | 64755     | 0,82 | 1,80E-06  |
| <i>CCDC94</i>     | coiled-coil domain containing 94                         | 55702     | 0,82 | 2,40E-06  |
| <i>FUBP1</i>      | far upstream element (FUSE) binding protein 1            | 8880      | 0,82 | 2,80E-06  |
| <i>OSGEP</i>      | O-sialoglycoprotein endopeptidase                        | 55644     | 0,82 | 3,80E-06  |
| <i>NONO</i>       | non-POU domain containing, octamer-binding               | 4841      | 0,82 | 4,30E-06  |
| <i>MDFI</i>       | MyoD family inhibitor                                    | 4188      | 0,82 | 4,40E-06  |
| <i>C17orf65</i>   | chromosome 17 open reading frame 65                      | 339201    | 0,82 | 5,10E-06  |
| <i>LOC1002331</i> | tektin 4 pseudogene                                      | 100233156 | 0,82 | 5,90E-06  |
| <i>RABEP2</i>     | rabaptin, RAB GTPase binding effector protein 2          | 79874     | 0,82 | 7,00E-06  |
| <i>STAT2</i>      | signal transducer and activator of transcription 2, 113k | 6773      | 0,82 | 9,70E-06  |
| <i>RALGAPA2</i>   | Ral GTPase activating protein, alpha subunit 2 (cataly   | 57186     | 0,82 | 1,40E-05  |
| <i>DUS3L</i>      | dihydrouridine synthase 3-like (S. cerevisiae)           | 56931     | 0,82 | 1,89E-05  |
| <i>LOC1005075</i> | uncharacterized LOC100507577                             | 100507577 | 0,82 | 4,96E-05  |
| <i>RADIL</i>      | Ras association and DIL domains                          | 55698     | 0,82 | 6,32E-05  |
| <i>USP43</i>      | ubiquitin specific peptidase 43                          | 124739    | 0,82 | 7,81E-05  |
| <i>C1QTNF3</i>    | C1q and tumor necrosis factor related protein 3          | 114899    | 0,82 | 0,0001331 |
| <i>DOCK2</i>      | dedicator of cytokinesis 2                               | 1794      | 0,82 | 0,0001466 |
| <i>SLC45A3</i>    | solute carrier family 45, member 3                       | 85414     | 0,82 | 0,000399  |
| <i>LOC1002722</i> | uncharacterized LOC100272228                             | 100272228 | 0,82 | 0,0005538 |
| <i>RRN3P3</i>     | RNA polymerase I transcription factor homolog (S. cer    | 100131998 | 0,82 | 0,0008589 |
| <i>NCBP2</i>      | nuclear cap binding protein subunit 2, 20kDa             | 22916     | 0,81 | 2,00E-07  |
| <i>NXF5</i>       | nuclear RNA export factor 5                              | 55998     | 0,81 | 3,00E-07  |
| <i>KRT3</i>       | keratin 3                                                | 3850      | 0,81 | 4,00E-07  |
| <i>PCDHB18</i>    | protocadherin beta 18 pseudogene                         | 54660     | 0,81 | 7,00E-07  |
| <i>CLSTN3</i>     | calsyntenin 3                                            | 9746      | 0,81 | 1,10E-06  |
| <i>YY1AP1</i>     | YY1 associated protein 1                                 | 55249     | 0,81 | 4,30E-06  |

|                     |                                                          |           |      |           |
|---------------------|----------------------------------------------------------|-----------|------|-----------|
| <i>NADSYN1</i>      | NAD synthetase 1                                         | 55191     | 0,81 | 4,40E-06  |
| <i>WDR6</i>         | WD repeat domain 6                                       | 11180     | 0,81 | 6,60E-06  |
| <i>GMPPA</i>        | GDP-mannose pyrophosphorylase A                          | 29926     | 0,81 | 7,30E-06  |
| <i>MZF1</i>         | myeloid zinc finger 1                                    | 7593      | 0,81 | 8,10E-06  |
| <i>ASB3</i>         | ankyrin repeat and SOCS box containing 3                 | 51130     | 0,81 | 1,43E-05  |
| <i>AMT</i>          | aminomethyltransferase                                   | 275       | 0,81 | 1,94E-05  |
| <i>LOC100506057</i> | uncharacterized LOC100506057                             | 100506057 | 0,81 | 2,18E-05  |
| <i>NOP56</i>        | NOP56 ribonucleoprotein homolog (yeast)                  | 10528     | 0,81 | 2,21E-05  |
| <i>AHSA2</i>        | AHA1, activator of heat shock 90kDa protein ATPase       | 130872    | 0,81 | 4,07E-05  |
| <i>CDK2</i>         | cyclin-dependent kinase 2                                | 1017      | 0,81 | 5,71E-05  |
| <i>EPHB6</i>        | EPH receptor B6                                          | 2051      | 0,81 | 7,31E-05  |
| <i>RASSF1</i>       | Ras association (RalGDS/AF-6) domain family memb         | 11186     | 0,81 | 7,93E-05  |
| <i>TMEM44</i>       | transmembrane protein 44                                 | 93109     | 0,81 | 0,0001056 |
| <i>ZCCHC11</i>      | zinc finger, CCHC domain containing 11                   | 23318     | 0,81 | 0,0002328 |
| <i>HIST1H2BB</i>    | histone cluster 1, H2bb                                  | 3018      | 0,81 | 0,0003787 |
| <i>PAK6</i>         | p21 protein (Cdc42/Rac)-activated kinase 6               | 56924     | 0,81 | 0,0004274 |
| <i>GTF2I</i>        | general transcription factor Iii                         | 2969      | 0,81 | 0,0005971 |
| <i>IL3RA</i>        | interleukin 3 receptor, alpha (low affinity)             | 3563      | 0,81 | 0,0006455 |
| <i>SUPT3H</i>       | suppressor of Ty 3 homolog (S. cerevisiae)               | 8464      | 0,81 | 0,0006496 |
| <i>FARSA</i>        | phenylalanyl-tRNA synthetase, alpha subunit              | 2193      | 0,81 | 0,000961  |
| <i>FAM193B</i>      | family with sequence similarity 193, member B            | 54540     | 0,8  | < 1e-07   |
| <i>LEPRE1</i>       | leucine proline-enriched proteoglycan (leprecan) 1       | 64175     | 0,8  | 6,00E-07  |
| <i>ITIH4</i>        | inter-alpha-trypsin inhibitor heavy chain family, membe  | 3700      | 0,8  | 1,60E-06  |
| <i>RASAL3</i>       | RAS protein activator like 3                             | 64926     | 0,8  | 3,50E-06  |
| <i>TRMT1</i>        | tRNA methyltransferase 1 homolog (S. cerevisiae)         | 55621     | 0,8  | 6,50E-06  |
| <i>TP53BP1</i>      | tumor protein p53 binding protein 1                      | 7158      | 0,8  | 7,30E-06  |
| <i>CDRT15L2</i>     | CMT1A duplicated region transcript 15-like 2             | 256223    | 0,8  | 1,08E-05  |
| <i>RCC2</i>         | regulator of chromosome condensation 2                   | 55920     | 0,8  | 1,30E-05  |
| <i>CHTF18</i>       | CTF18, chromosome transmission fidelity factor 18 hc     | 63922     | 0,8  | 1,63E-05  |
| <i>UCN</i>          | urocortin                                                | 7349      | 0,8  | 1,68E-05  |
| <i>EBLN2</i>        | endogenous Bornavirus-like nucleoprotein 2               | 55096     | 0,8  | 3,06E-05  |
| <i>RANBP1</i>       | RAN binding protein 1                                    | 5902      | 0,8  | 3,22E-05  |
| <i>AFF1</i>         | AF4/FMR2 family, member 1                                | 4299      | 0,8  | 3,63E-05  |
| <i>ALYREF</i>       | Aly/REF export factor                                    | 10189     | 0,8  | 3,82E-05  |
| <i>TBC1D2B</i>      | TBC1 domain family, member 2B                            | 23102     | 0,8  | 5,46E-05  |
| <i>AMD1</i>         | adenosylmethionine decarboxylase 1                       | 262       | 0,8  | 7,01E-05  |
| <i>RGL2</i>         | ral guanine nucleotide dissociation stimulator-like 2    | 5863      | 0,8  | 8,00E-05  |
| <i>FGFR1OP</i>      | FGFR1 oncogene partner                                   | 11116     | 0,8  | 0,0001222 |
| <i>SLC25A29</i>     | solute carrier family 25 (mitochondrial carnitine/acylca | 123096    | 0,8  | 0,0002284 |
| <i>ZNF790-AS1</i>   | ZNF790 antisense RNA 1                                   | 284408    | 0,8  | 0,0003209 |
| <i>HHAT</i>         | hedgehog acyltransferase                                 | 55733     | 0,8  | 0,00044   |
| <i>WDR52</i>        | WD repeat domain 52                                      | 55779     | 0,8  | 0,0006801 |
| <i>C19orf81</i>     | chromosome 19 open reading frame 81                      | 342918    | 0,79 | < 1e-07   |
| <i>P4HTM</i>        | prolyl 4-hydroxylase, transmembrane (endoplasmic re      | 54681     | 0,79 | 1,00E-07  |
| <i>CHKB</i>         | choline kinase beta                                      | 1120      | 0,79 | 1,00E-07  |
| <i>CCNL2</i>        | cyclin L2                                                | 81669     | 0,79 | 2,00E-07  |
| <i>WDFY2</i>        | WD repeat and FYVE domain containing 2                   | 115825    | 0,79 | 4,90E-06  |
| <i>GDF11</i>        | growth differentiation factor 11                         | 10220     | 0,79 | 8,30E-06  |
| <i>PMCHL1</i>       | pro-melanin-concentrating hormone-like 1, pseudoger      | 5369      | 0,79 | 8,60E-06  |
| <i>CCDC84</i>       | coiled-coil domain containing 84                         | 338657    | 0,79 | 1,36E-05  |
| <i>PMS2P5</i>       | postmeiotic segregation increased 2 pseudogene 5         | 5383      | 0,79 | 1,59E-05  |
| <i>LOC100996753</i> | postmeiotic segregation increased 2-like protein 5-like  | 100996753 | 0,79 | 1,59E-05  |
| <i>RASGRP2</i>      | RAS guanyl releasing protein 2 (calcium and DAG-rec      | 10235     | 0,79 | 3,56E-05  |
| <i>ZNF767</i>       | zinc finger family member 767                            | 79970     | 0,79 | 3,94E-05  |
| <i>UBA7</i>         | ubiquitin-like modifier activating enzyme 7              | 7318      | 0,79 | 8,77E-05  |

|                     |                                                                |           |      |           |
|---------------------|----------------------------------------------------------------|-----------|------|-----------|
| <i>HIST1H4D</i>     | histone cluster 1, H4d                                         | 8360      | 0,79 | 0,0001439 |
| <i>LCN6</i>         | lipocalin 6                                                    | 158062    | 0,79 | 0,000186  |
| <i>NEAT1</i>        | nuclear paraspeckle assembly transcript 1 (non-protein-coding) | 283131    | 0,79 | 0,0003254 |
| <i>USP54</i>        | ubiquitin specific peptidase 54                                | 159195    | 0,79 | 0,0003829 |
| <i>HHIP-AS1</i>     | HHIP antisense RNA 1                                           | 646576    | 0,79 | 0,0008366 |
| <i>RNF220</i>       | ring finger protein 220                                        | 55182     | 0,78 | < 1e-07   |
| <i>RAMP2-AS1</i>    | RAMP2 antisense RNA 1                                          | 100190938 | 0,78 | < 1e-07   |
| <i>KDM1A</i>        | lysine (K)-specific demethylase 1A                             | 23028     | 0,78 | 2,00E-07  |
| <i>GPR75-ASB3</i>   | GPR75-ASB3 readthrough                                         | 100302652 | 0,78 | 5,00E-07  |
| <i>POU5F1P4</i>     | POU class 5 homeobox 1 pseudogene 4                            | 645682    | 0,78 | 6,00E-07  |
| <i>POLR1C</i>       | polymerase (RNA) I polypeptide C, 30kDa                        | 9533      | 0,78 | 9,00E-07  |
| <i>ACAP1</i>        | ArfGAP with coiled-coil, ankyrin repeat and PH domain          | 9744      | 0,78 | 2,90E-06  |
| <i>ST3GAL4</i>      | ST3 beta-galactoside alpha-2,3-sialyltransferase 4             | 6484      | 0,78 | 4,50E-06  |
| <i>IRF3</i>         | interferon regulatory factor 3                                 | 3661      | 0,78 | 8,90E-06  |
| <i>NOP2</i>         | NOP2 nucleolar protein homolog (yeast)                         | 4839      | 0,78 | 9,00E-06  |
| <i>EGFL8</i>        | EGF-like-domain, multiple 8                                    | 80864     | 0,78 | 1,01E-05  |
| <i>PPT2-EGFL8</i>   | PPT2-EGFL8 readthrough                                         | 100532746 | 0,78 | 1,01E-05  |
| <i>LOC100996496</i> | uncharacterized LOC100996496                                   | 100996496 | 0,78 | 2,35E-05  |
| <i>FANK1</i>        | fibronectin type III and ankyrin repeat domains 1              | 92565     | 0,78 | 4,93E-05  |
| <i>EFHC1</i>        | EF-hand domain (C-terminal) containing 1                       | 114327    | 0,78 | 5,85E-05  |
| <i>TSPAN32</i>      | tetraspanin 32                                                 | 10077     | 0,78 | 9,48E-05  |
| <i>HOXB4</i>        | homeobox B4                                                    | 3214      | 0,78 | 0,0001196 |
| <i>DROSHA</i>       | drosha, ribonuclease type III                                  | 29102     | 0,78 | 0,0001317 |
| <i>DAZ4</i>         | deleted in azoospermia 4                                       | 57135     | 0,78 | 0,0002801 |
| <i>DAZ2</i>         | deleted in azoospermia 2                                       | 57055     | 0,78 | 0,0002801 |
| <i>DAZ1</i>         | deleted in azoospermia 1                                       | 1617      | 0,78 | 0,0002801 |
| <i>DAZ3</i>         | deleted in azoospermia 3                                       | 57054     | 0,78 | 0,0002801 |
| <i>ZNF385C</i>      | zinc finger protein 385C                                       | 201181    | 0,78 | 0,0003901 |
| <i>PIEZO1</i>       | piezo-type mechanosensitive ion channel component              | 9780      | 0,78 | 0,0004305 |
| <i>SLC17A9</i>      | solute carrier family 17, member 9                             | 63910     | 0,78 | 0,0008571 |
| <i>SAA1</i>         | serum amyloid A1                                               | 6288      | 0,77 | < 1e-07   |
| <i>TOMM22</i>       | translocase of outer mitochondrial membrane 22 homolog         | 56993     | 0,77 | < 1e-07   |
| <i>HIST1H2AK</i>    | histone cluster 1, H2ak                                        | 8330      | 0,77 | < 1e-07   |
| <i>CDK5RAP3</i>     | CDK5 regulatory subunit associated protein 3                   | 80279     | 0,77 | < 1e-07   |
| <i>PYROXD2</i>      | pyridine nucleotide-disulphide oxidoreductase domain           | 84795     | 0,77 | 2,00E-07  |
| <i>GAGE10</i>       | G antigen 10                                                   | 643832    | 0,77 | 3,30E-06  |
| <i>MYO15B</i>       | myosin XVb pseudogene                                          | 80022     | 0,77 | 5,30E-06  |
| <i>SERF1B</i>       | small EDRK-rich factor 1B (centromeric)                        | 728492    | 0,77 | 5,62E-05  |
| <i>SERF1A</i>       | small EDRK-rich factor 1A (telomeric)                          | 8293      | 0,77 | 5,62E-05  |
| <i>SH3D21</i>       | SH3 domain containing 21                                       | 79729     | 0,77 | 5,82E-05  |
| <i>ISYNA1</i>       | inositol-3-phosphate synthase 1                                | 51477     | 0,77 | 0,000194  |
| <i>LOC153684</i>    | uncharacterized LOC153684                                      | 153684    | 0,77 | 0,0004064 |
| <i>FBXW4P1</i>      | F-box and WD repeat domain containing 4 pseudogene             | 26226     | 0,77 | 0,000774  |
| <i>UGGT2</i>        | UDP-glucose glycoprotein glucosyltransferase 2                 | 55757     | 0,77 | 0,0007977 |
| <i>ZDHHC8P1</i>     | zinc finger, DHHC-type containing 8 pseudogene 1               | 150244    | 0,76 | < 1e-07   |
| <i>TUSC5</i>        | tumor suppressor candidate 5                                   | 286753    | 0,76 | < 1e-07   |
| <i>STK11IP</i>      | serine/threonine kinase 11 interacting protein                 | 114790    | 0,76 | < 1e-07   |
| <i>TMEM151A</i>     | transmembrane protein 151A                                     | 256472    | 0,76 | < 1e-07   |
| <i>JSRP1</i>        | junctional sarcoplasmic reticulum protein 1                    | 126306    | 0,76 | < 1e-07   |
| <i>GAB3</i>         | GRB2-associated binding protein 3                              | 139716    | 0,76 | 2,80E-06  |
| <i>PILRB</i>        | paired immunoglobulin-like type 2 receptor beta                | 29990     | 0,76 | 9,80E-06  |
| <i>KIAA1683</i>     | KIAA1683                                                       | 80726     | 0,76 | 1,22E-05  |
| <i>MYCN</i>         | v-myc myelocytomatosis viral related oncogene, neuro           | 4613      | 0,76 | 1,62E-05  |
| <i>SOGA2</i>        | SOGA family member 2                                           | 23255     | 0,76 | 2,83E-05  |
| <i>GNMT</i>         | glycine N-methyltransferase                                    | 27232     | 0,76 | 4,19E-05  |

|                     |                                                                     |           |      |           |
|---------------------|---------------------------------------------------------------------|-----------|------|-----------|
| <i>FOXP1-IT1</i>    | FOXP1 intronic transcript 1 (non-protein coding)                    | 100506815 | 0,76 | 9,92E-05  |
| <i>METTL3</i>       | methyltransferase like 3                                            | 56339     | 0,76 | 0,0005141 |
| <i>CATSPER2</i>     | cation channel, sperm associated 2                                  | 117155    | 0,75 | < 1e-07   |
| <i>KIFC3</i>        | kinesin family member C3                                            | 3801      | 0,75 | < 1e-07   |
| <i>OGT</i>          | O-linked N-acetylglucosamine (GlcNAc) transferase                   | 8473      | 0,75 | 7,00E-07  |
| <i>INTS3</i>        | integrator complex subunit 3                                        | 65123     | 0,75 | 4,80E-05  |
| <i>COPG2IT1</i>     | COPG2 imprinted transcript 1 (non-protein coding)                   | 53844     | 0,75 | 0,0001167 |
| <i>LTC4S</i>        | leukotriene C4 synthase                                             | 4056      | 0,75 | 0,0001699 |
| <i>ACCS</i>         | 1-aminocyclopropane-1-carboxylate synthase homolo                   | 84680     | 0,75 | 0,0002815 |
| <i>C21orf56</i>     | chromosome 21 open reading frame 56                                 | 84221     | 0,75 | 0,0007073 |
| <i>AK2</i>          | adenylate kinase 2                                                  | 204       | 0,75 | 0,0008129 |
| <i>CRYBB2P1</i>     | crystallin, beta B2 pseudogene 1                                    | 1416      | 0,74 | < 1e-07   |
| <i>MYO1G</i>        | myosin IG                                                           | 64005     | 0,74 | 0,000332  |
| <i>SAA2</i>         | serum amyloid A2                                                    | 6289      | 0,73 | < 1e-07   |
| <i>OSBPL5</i>       | oxysterol binding protein-like 5                                    | 114879    | 0,73 | < 1e-07   |
| <i>BAHCC1</i>       | BAH domain and coiled-coil containing 1                             | 57597     | 0,73 | 5,00E-07  |
| <i>HIST1H2BH</i>    | histone cluster 1, H2bh                                             | 8345      | 0,73 | 9,00E-07  |
| <i>ATP2A3</i>       | ATPase, Ca <sup>++</sup> transporting, ubiquitous                   | 489       | 0,73 | 2,50E-06  |
| <i>HCST</i>         | hematopoietic cell signal transducer                                | 10870     | 0,73 | 1,20E-05  |
| <i>HIST1H2AM</i>    | histone cluster 1, H2am                                             | 8336      | 0,73 | 8,17E-05  |
| <i>IL12A</i>        | interleukin 12A (natural killer cell stimulatory factor 1, $\gamma$ | 3592      | 0,73 | 0,0001393 |
| <i>BEX4</i>         | brain expressed, X-linked 4                                         | 56271     | 0,73 | 0,0006705 |
| <i>LTB4R2</i>       | leukotriene B4 receptor 2                                           | 56413     | 0,72 | < 1e-07   |
| <i>HNRNPH1</i>      | heterogeneous nuclear ribonucleoprotein H1 (H)                      | 3187      | 0,72 | < 1e-07   |
| <i>AP1G2</i>        | adaptor-related protein complex 1, gamma 2 subunit                  | 8906      | 0,72 | 3,00E-07  |
| <i>CEL</i>          | carboxyl ester lipase (bile salt-stimulated lipase)                 | 1056      | 0,72 | 6,30E-06  |
| <i>HIST1H2BK</i>    | histone cluster 1, H2bk                                             | 85236     | 0,72 | 7,29E-05  |
| <i>LPPR3</i>        | lipid phosphate phosphatase-related protein type 3                  | 79948     | 0,72 | 9,42E-05  |
| <i>LOC100507520</i> | uncharacterized LOC100507520                                        | 100507520 | 0,72 | 0,0001004 |
| <i>HOXA3</i>        | homeobox A3                                                         | 3200      | 0,72 | 0,0006867 |
| <i>TCF15</i>        | transcription factor 15 (basic helix-loop-helix)                    | 6939      | 0,71 | < 1e-07   |
| <i>CYP11B2</i>      | cytochrome P450, family 11, subfamily B, polypeptide                | 1585      | 0,71 | < 1e-07   |
| <i>MBOAT1</i>       | membrane bound O-acyltransferase domain containin                   | 154141    | 0,71 | < 1e-07   |
| <i>PIK3R6</i>       | phosphoinositide-3-kinase, regulatory subunit 6                     | 146850    | 0,71 | 6,40E-06  |
| <i>P2RX1</i>        | purinergic receptor P2X, ligand-gated ion channel, 1                | 5023      | 0,71 | 6,50E-06  |
| <i>SOX4</i>         | SRY (sex determining region Y)-box 4                                | 6659      | 0,71 | 0,0007905 |
| <i>TARBP1</i>       | TAR (HIV-1) RNA binding protein 1                                   | 6894      | 0,7  | 5,00E-07  |
| <i>MAT2A</i>        | methionine adenosyltransferase II, alpha                            | 4144      | 0,7  | 8,00E-07  |
| <i>HIST1H2BO</i>    | histone cluster 1, H2bo                                             | 8348      | 0,7  | 3,10E-06  |
| <i>FAM185A</i>      | family with sequence similarity 185, member A                       | 222234    | 0,69 | < 1e-07   |
| <i>C16orf93</i>     | chromosome 16 open reading frame 93                                 | 90835     | 0,69 | 1,00E-07  |
| <i>DUSP10</i>       | dual specificity phosphatase 10                                     | 11221     | 0,69 | 1,20E-06  |
| <i>MICALL2</i>      | MICAL-like 2                                                        | 79778     | 0,69 | 5,99E-05  |
| <i>ATAT1</i>        | alpha tubulin acetyltransferase 1                                   | 79969     | 0,68 | < 1e-07   |
| <i>LTK</i>          | leukocyte receptor tyrosine kinase                                  | 4058      | 0,68 | 8,00E-07  |
| <i>NSUN5P2</i>      | NOP2/Sun domain family, member 5 pseudogene 2                       | 260294    | 0,68 | 6,25E-05  |
| <i>NSUN5P1</i>      | NOP2/Sun domain family, member 5 pseudogene 1                       | 155400    | 0,67 | 4,00E-07  |
| <i>C1orf186</i>     | chromosome 1 open reading frame 186                                 | 440712    | 0,66 | 2,71E-05  |
| <i>CTSW</i>         | cathepsin W                                                         | 1521      | 0,66 | 0,0001499 |
| <i>TCN1</i>         | transcobalamin I (vitamin B12 binding protein, R binder             | 6947      | 0,66 | 0,0003309 |
| <i>HIST1H2BE</i>    | histone cluster 1, H2be                                             | 8344      | 0,65 | < 1e-07   |
| <i>CD33</i>         | CD33 molecule                                                       | 945       | 0,65 | 7,40E-05  |
| <i>TIE1</i>         | tyrosine kinase with immunoglobulin-like and EGF-like               | 7075      | 0,65 | 0,0001286 |
| <i>ZNF69</i>        | zinc finger protein 69                                              | 7620      | 0,64 | < 1e-07   |
| <i>HNRNPCL1</i>     | heterogeneous nuclear ribonucleoprotein C-like 1                    | 343069    | 0,64 | < 1e-07   |

|                  |                                                            |        |      |           |
|------------------|------------------------------------------------------------|--------|------|-----------|
| <i>FAM46A</i>    | family with sequence similarity 46, member A               | 55603  | 0,64 | 5,00E-07  |
| <i>HIST1H2BI</i> | histone cluster 1, H2bi                                    | 8346   | 0,63 | 3,00E-07  |
| <i>HIST1H2BD</i> | histone cluster 1, H2bd                                    | 3017   | 0,63 | 0,0003915 |
| <i>C1orf228</i>  | chromosome 1 open reading frame 228                        | 339541 | 0,62 | 1,83E-05  |
| <i>CSF2RB</i>    | colony stimulating factor 2 receptor, beta, low-affinity ( | 1439   | 0,62 | 3,79E-05  |
| <i>HIST1H2BF</i> | histone cluster 1, H2bf                                    | 8343   | 0,61 | 1,37E-05  |
| <i>RASGRP3</i>   | RAS guanyl releasing protein 3 (calcium and DAG-reg        | 25780  | 0,6  | 0,0002793 |
| <i>HDC</i>       | histidine decarboxylase                                    | 3067   | 0,57 | 2,44E-05  |
| <i>LOC285758</i> | uncharacterized LOC285758                                  | 285758 | 0,56 | 6,92E-05  |
| <i>HIST1H3D</i>  | histone cluster 1, H3d                                     | 8351   | 0,55 | 7,40E-06  |
| <i>HIST2H2BE</i> | histone cluster 2, H2be                                    | 8349   | 0,54 | 8,00E-07  |
| <i>HIST1H2AD</i> | histone cluster 1, H2ad                                    | 3013   | 0,53 | 2,00E-07  |
| <i>DPY19L2</i>   | dpy-19-like 2 ( <i>C. elegans</i> )                        | 283417 | 0,51 | 1,89E-05  |
| <i>MPO</i>       | myeloperoxidase                                            | 4353   | 0,51 | 0,0008496 |
| <i>LGALS3BP</i>  | lectin, galactoside-binding, soluble, 3 binding protein    | 3959   | 0,5  | 0,0001763 |
| <i>CLC</i>       | Charcot-Leyden crystal protein                             | 1178   | 0,49 | 0,0002768 |
